# Supplementary material for: Viral mapping in COVID-19 deceased in the Augsburg autopsy series of the first wave: A multiorgan and multimethodological approach
Source: PubMed Central journal article supplement (PMC8289110; doi:10.1371/journal.pone.0254872), 2021-07-19
Supplement: pone.0254872.s002.pdf [file pone.0254872.s002.pdf]

## **RNAscope® 2.5 RED Detection & IHC**

### **FFPE cuts & dewaxing**

*Materials: TOMO Slides, 2 x 200 ml Xylene, 2 x 200 ml 100% Alcohol.*

1. Cut the Kerosene blocks into 2 µm thick, put them into a water bath (at 40 - 45°C), place them on the TOMO slides and let them dry overnight at RT.
2. Bake the next day for 1 hour at 60°C.
3. Place in xylene for 5 minutes at RT.
4. 5 minutes in Xylene at RT.
5. 1 minute in 100% Alcohol.
6. 1 minute in 100% Alcohol.
7. Air-dry for 5 minutes at RT.

### **RNAscope® Hydrogen Peroxide, H<sub>2</sub>O<sub>2</sub>**

*Materials: RNAscope® Hydrogen Peroxide, 200 ml 1X RNAscope® Target Retrieval Reagents (diluted to 1:9, 180 ml diH<sub>2</sub>O with 20 ml 10X RNAscope® Target Retrieval Reagents mix well), dH<sub>2</sub>O, Steamer, digital thermometer.*

1. Switch on the steam cooker. Place a beaker with 200 ml 1X RNAscope® Target Retrieval reagents and another beaker with diH<sub>2</sub>O.
2. Apply 5 to 8 drops of RNAscope® Hydrogen Peroxide.
3. Incubate for 10 minutes at RT.
4. Rinse up and down 2 x 3-5 times with dH<sub>2</sub>O.
5. place in diH<sub>2</sub>O for 10 seconds at 80°C to acclimatize and then place in 1X RNAscope® Target Retrieval Reagents for a further 15 minutes (temperature between 102 - 104°C). Digestion time varies depending on tissue type, see table - last page.
6. Rinse with diH<sub>2</sub>O for 15 seconds.
7. Place in 100% alcohol for 3 minutes.
8. Air dry at RT.
9. Draw barrier

### **RNAscope® Protease Plus & Staining with Fast RED**

*Materials: HybEz Oven, HybEz Slide Rack, HybEZ™ Control Tray, RNAscope® Protease Plus, Target Probes (Hs - PPIB, Dab-β, V-nCoV20019-s: ssRNA(+), V-nCoV20019-s-Sense: ssRNA(-), warm up for 10 minutes at 40°C in a water bath before use), AMP 1-6 Reagents, 3 liters 1x Wash Buffer (diluted 1: 49 mix 2940 ml diH<sub>2</sub>O with 50x RNAscope® Wash Buffer, warm up the Wash Buffer for 10 minutes at 40°C before use), Fast RED A-B (diluted 1:60), 200 ml counterstaining reagent (diluted 1: 1, mix 100 ml Hematoxylin Gill's I with 100 ml dH<sub>2</sub>O), 0.02% ammonium hydroxide solution (mix 1.43 ml 1N ammonium hydroxide with 250 ml dH<sub>2</sub>O), 200 ml xylene, Gabis hot plate, Eukitt™ Cover media, 24 mm x 50 mm cover glasses.*

- Preheat 1st oven to 40°C.
- Add 5 drops of RNAscope® Protease Plus on each cut.
- 3. Place the HybEZ™ rack in the oven for 30 minutes at 40°C (The digestion time varies according to tissue type, see table - last page).
- Pour away excess liquid.

- Rinse 3 - 5 times in diH<sub>2</sub>O
- Add 4 drops from the target probe.
- Place in the oven for 2 hours at 40°C
- Pour away excess liquid.
- Rinse 2 times with 1X Wash Buffer for 2 minutes at RT.
- Add 4 drops from the AMP 1.
- Place in oven for 30 minutes at 40°C.
- For hybridization of reagents AMP 2 - 6 repeat steps 8 to 11! **PAY ATTENTION TO THE TIMES AND TEMPERATURES OF DIGESTION!**

| Reagents | Time       | Temperatures °C |
|----------|------------|-----------------|
| AMP 2    | 15 Minutes | 40°C            |
| AMP 3    | 30 Minutes | 40°C            |
| AMP 4    | 15 Minutes | 40°C            |
| AMP 5    | 30 Minutes | RT              |
| AMP 6    | 15 Minutes | RT              |

13. Rinse 2 x with 1X Wash Buffer for 2 minutes at RT
14. Pour away excess liquid.
15. Pipette 240 µl from the Fast RED A-B on each slide.
16. Incubate for 10 minutes at RT.
17. Rinse 2-3 times with diH<sub>2</sub>O.

## HE - Staining

*Materials: 200 ml counterstaining reagent (diluted 1:1, mix 100 ml Hematoxylin Gill's I with 100 ml diH<sub>2</sub>O), 0.02% ammonium hydroxide solution (mix 1.43 ml 1N ammonium hydroxide with 250 ml diH<sub>2</sub>O), 200 ml xylene, Gabis hot plate, Eukitt™ Covering medium, 24 mm x 50 mm cover glasses.*

1. 2 minutes in hematoxylin staining solution.
2. Rinse with tap water 2-3 times.
3. In 0.02% ammonium hydroxide solution.
4. Rinse with tap water 2-3 times.
5. Place on the heating plate for 15 minutes at 60°C
6. place in Xylene until the barrier is dissolved
7. Place 1 drop Eukitt™ flashing medium and 24 mm x 50 mm cover glass.
8. Air dry for 5 minutes.

| <u>Tissue Type</u> | <u>Pathology</u> | <u>RNAscope Target Retrieval Reagent</u> | <u>RNAscope Protease Plus</u> |
|--------------------|------------------|------------------------------------------|-------------------------------|
| Intenstine         | Normal           | 15 Min                                   | 30 Min                        |
| Instenstine        | Tumor            | 15 Min                                   | 30 Min                        |
| Embryo             | Normal           | 15 Min                                   | 30 Min                        |
| Brain              | Normal           | 15 Min                                   | 30 Min                        |
| Brain              | Cancer           | 15 Min                                   | 30 Min                        |

|                                                               |          |        |        |
|---------------------------------------------------------------|----------|--------|--------|
| Spleen                                                        | Normal   | 15 Min | 30 Min |
| Eye / Retina                                                  | Normal   | 15 Min | 30 Min |
| Heart                                                         | Normal   | 15 Min | 30 Min |
| Muscels                                                       | Normal   | 15 Min | 30 Min |
| Vessels                                                       | Normal   | 15 Min | 30 Min |
| Liver                                                         | Normal   | 30 Min | 30 Min |
| Liver                                                         | Cancer   | 15 Min | 30 Min |
| Kidney                                                        | Normal   | 15 Min | 30 Min |
| Breast                                                        | Cancer   | 15 Min | 30 Min |
| Breast(TMA)                                                   | Normal   | 15 Min | 30 Min |
| Colon                                                         | Normal   | 15 Min | 30 Min |
| Colon                                                         | Cancer   | 15 Min | 30 Min |
| Lung                                                          | Normal   | 15 MIN | 30 Min |
| Lung                                                          | Cancer   | 15 Min | 30 Min |
| Prostata                                                      | Normal   | 15 Min | 30 Min |
| Prostata                                                      | Cancer   | 15 Min | 30 Min |
| Lymph node                                                    | Normal   | 15 Min | 30 Min |
| Lymph nide                                                    | Cancer   | 15 Min | 30 Min |
| Pancreas                                                      | Normal   | 15 Min | 30 Min |
| Cervical                                                      | Normal   | 15 Min | 30 Min |
| Cervical                                                      | Cancer   | 15 Min | 30 Min |
| Cervical Dysplasia                                            | Abnormal | 15Min  | 30 Min |
| Head                                                          | Cancer   | 15 Min | 30 Min |
| Neck                                                          | Cancer   | 15 Min | 30 Min |
| Skin                                                          | Normal   | 15 Min | 30 Min |
| Skin (TMA)                                                    | Normal   | 15 Min | 30 Min |
| Melanoma                                                      | Normal   | 15 Min | 30 Min |
| Melanoma (TMA)                                                | Normal   | 15 Min | 30 Min |
| Nervus                                                        | Cancer   | 15 Min | 30 Min |
| Nervus (TMA)                                                  | Cancer   | 15 Min | 30 Min |
| Placenta                                                      | Normal   | 15 Min | 30 Min |
| Stomach (TMA)                                                 | Normal   | 15 Min | 30 Min |
| Stomach (TMA)                                                 | Cancer   | 15 Min | 30 Min |
| Cell Pellets, fixes 10% NBF                                   | -        | 15 Min | 30 Min |
| HeLa Zellen, fixed mit 10%<br>Formaldehyde/PBS/ACD<br>Control | -        | 15 Min | 30 Min |
